# Supplementary material for: The Role of Water in the Preparation and Stabilization of High‐Quality Phosphorene Flakes
Source: PubMed Central journal article supplement — Adv Mater Interfaces. 2015 Nov 30;3(3):1500441. doi: 10.1002/admi.201500441 (PMC4845640; doi:10.1002/admi.201500441), 2015-11-30
Supplement: ADMI-3-0-s001.pdf [file ADMI-3-0-s001.pdf]

# ADVANCED MATERIALS INTERFACES

## Supporting Information

for *Advanced Materials Interfaces*, DOI: 10.1002/admi.201500441

The Role of Water in the Preparation and Stabilization of  
High-Quality Phosphorene Flakes

*Manuel Serrano-Ruiz, Maria Caporali,\* Andrea Ienco,  
Vincenzo Piazza, Stefan Heun, and Maurizio Peruzzini\**

## Supporting Information

### The role of water in the preparation and stabilization of high quality phosphorene flakes

Manuel Serrano-Ruiz,<sup>a</sup> Maria Caporali,<sup>a,\*</sup> Andrea Ienco,<sup>a</sup> Vincenzo Piazza,<sup>b</sup> Stefan Heun,<sup>c</sup> Maurizio Peruzzini<sup>a,\*</sup>

Test A) P/H<sub>2</sub>O molar ratio equal to 15.0.

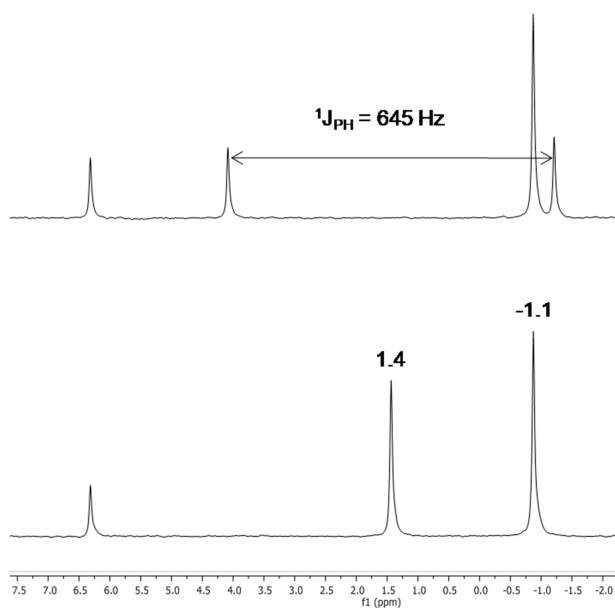

Figure S1. Up:  $^{31}\text{P}$  NMR and down:  $^{31}\text{P} \{^1\text{H}\}$  NMR (DMSO- $d_6$ ,  $T = 25^\circ\text{C}$ , 121.49 MHz) spectrum of a sample of Test A after 4 hours of sonication.

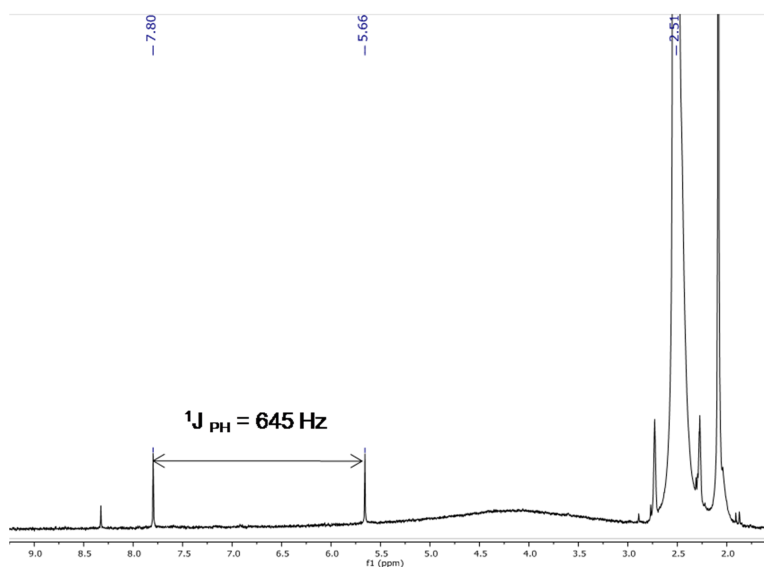

Figure S2.  $^1\text{H}$  NMR spectrum (DMSO- $d_6$ ,  $T = 25^\circ\text{C}$ , 300.13 MHz) after 4 hours of sonication.

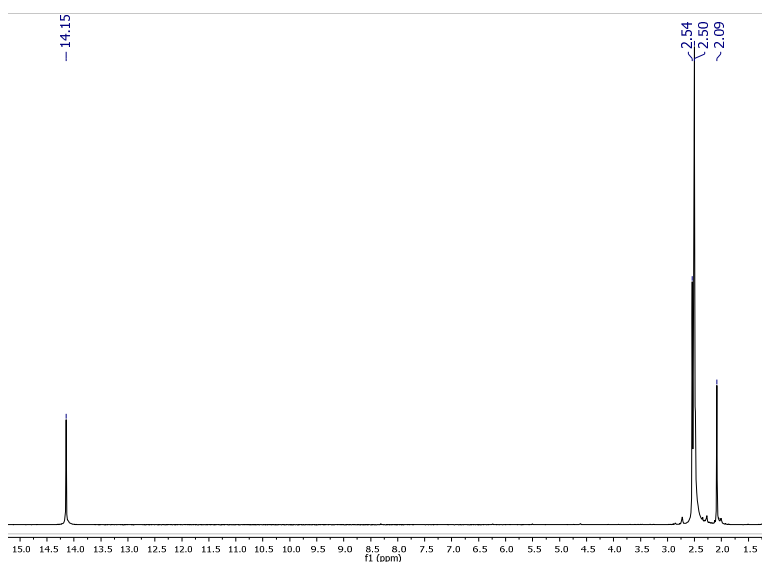

Figure S3.  $^1\text{H}$  NMR spectrum (DMSO- $\text{d}_6$ ,  $T = 25^\circ\text{C}$ , 300.13 MHz) after 20 hours of sonication.

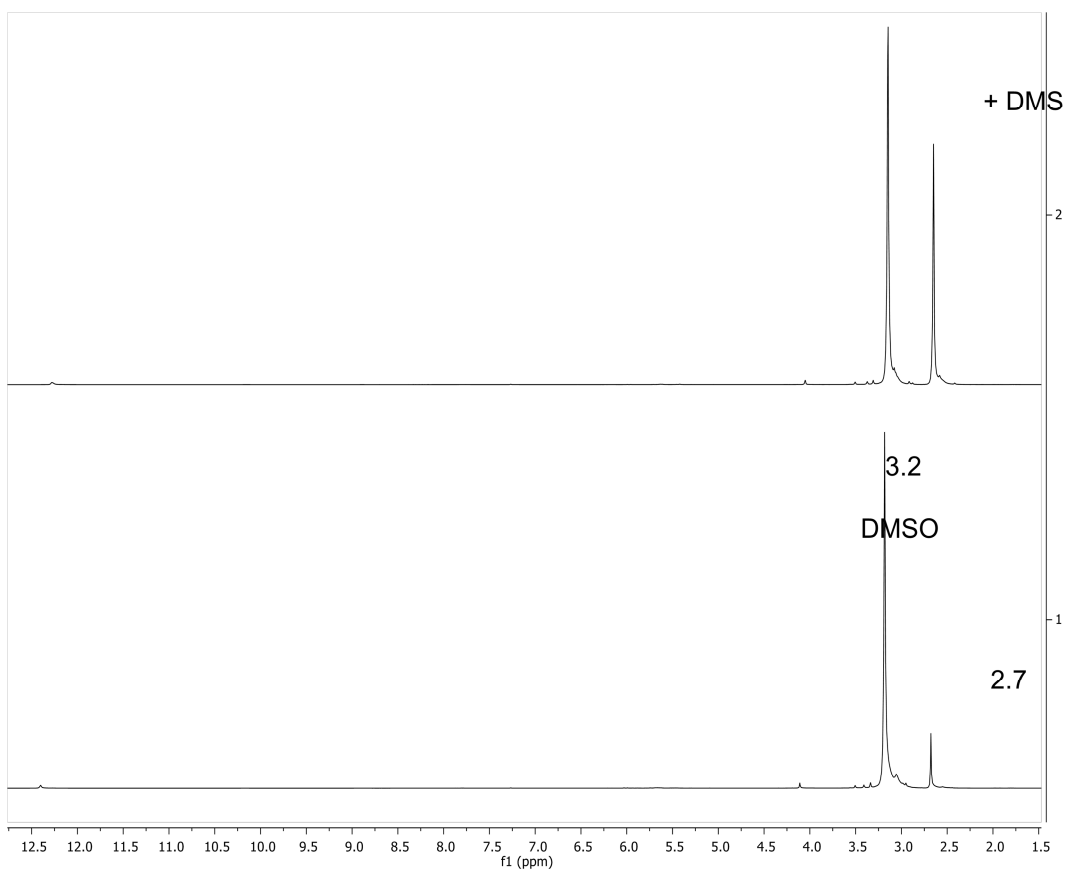

Figure S4.  $^1\text{H}$  NMR (DMSO,  $T = 25^\circ\text{C}$ , 300.13 MHz, capillary  $\text{C}_6\text{D}_6$ ). Down: reaction mixture before adding  $[\text{S}(\text{CH}_3)_2]$ ; top: after adding  $[\text{S}(\text{CH}_3)_2]$ .

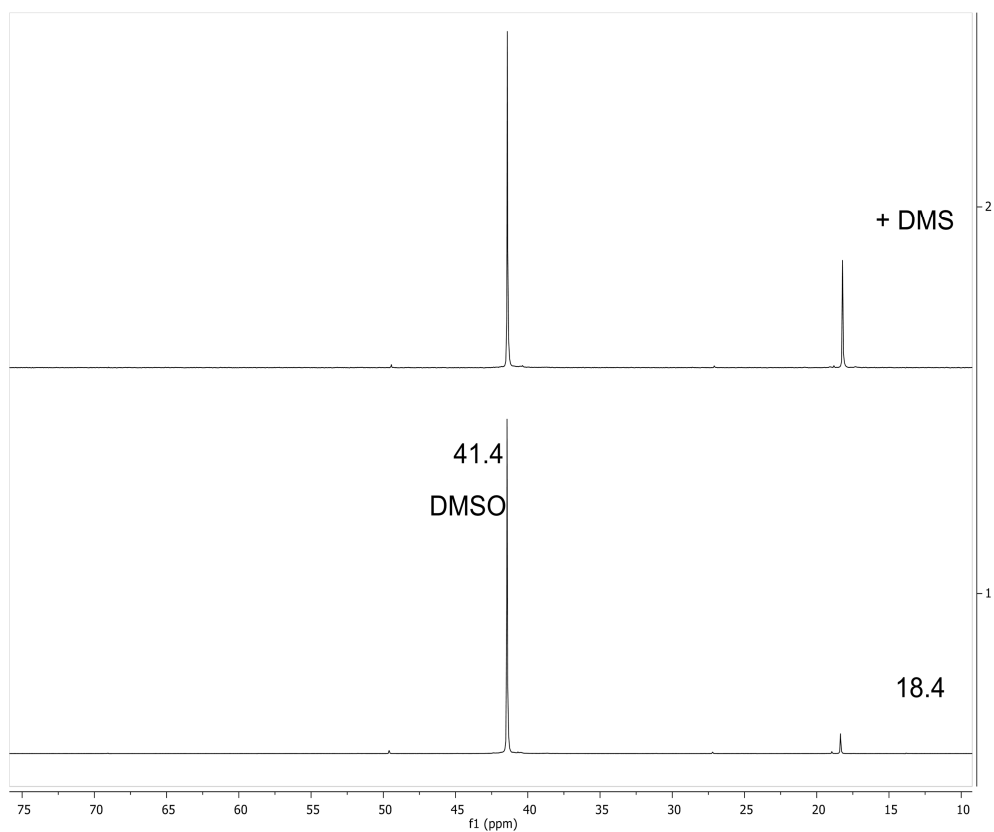

Figure S5.  $^{13}\text{C}$  NMR (DMSO,  $T = 25^\circ\text{C}$ , 75.5 MHz, capillary  $\text{C}_6\text{D}_6$ ). Down: reaction mixture before adding  $[\text{S}(\text{CH}_3)_2]$ ; top: after adding  $[\text{S}(\text{CH}_3)_2]$ .

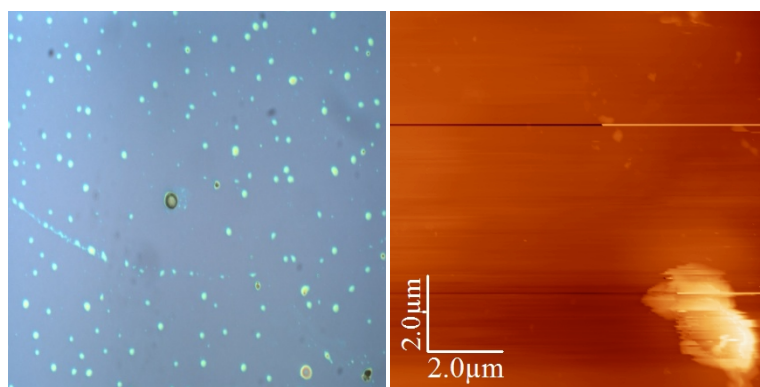

Figure S6. Left: optical microscopy image; Right: AFM of a sample of Test A after 20 hours of sonication, scale bar 2.0  $\mu\text{m}$ .

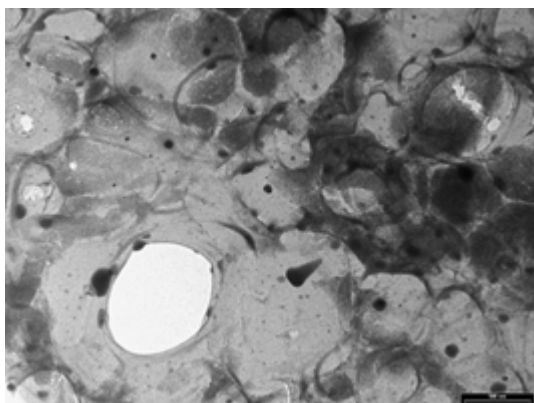

Figure S7. Bright field TEM image on holey carbon Cu grid of the sample in DMSO where P/H<sub>2</sub>O molar ratio equal to 15. Scale bar: 500 nm.

Test B) P/H<sub>2</sub>O molar ratio equal to 2.0.

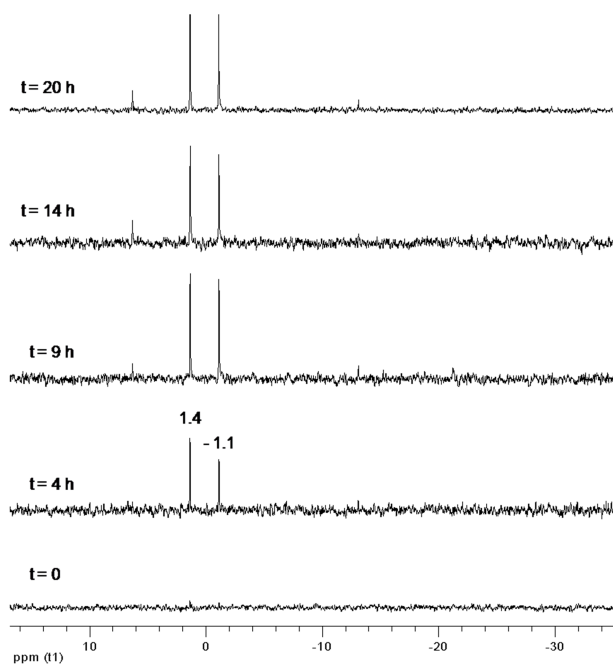

Figure S8. <sup>31</sup>P{<sup>1</sup>H} NMR spectra (DMSO-d<sub>6</sub>, T = 25°C, 121.49 MHz) of a sample of Test B, P/H<sub>2</sub>O molar ratio equal to 2, during sonication.

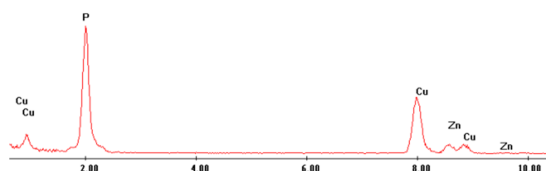

Figure S9. EDX carried out on the sample of Test B, P/H<sub>2</sub>O molar ratio equal to 2, after 20 h of sonication.

Test C) P/H<sub>2</sub>O molar ratio equal to 0.7.

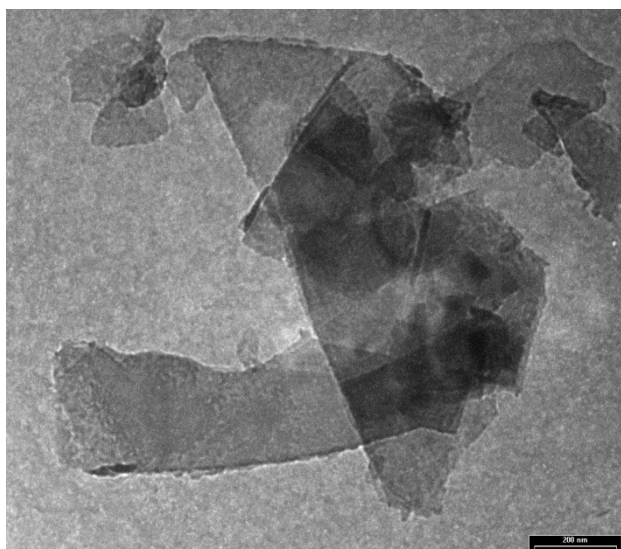

Figure S10. Bright field TEM image of DMSO-exfoliated BP nanosheets. Scale bar: 200 nm.

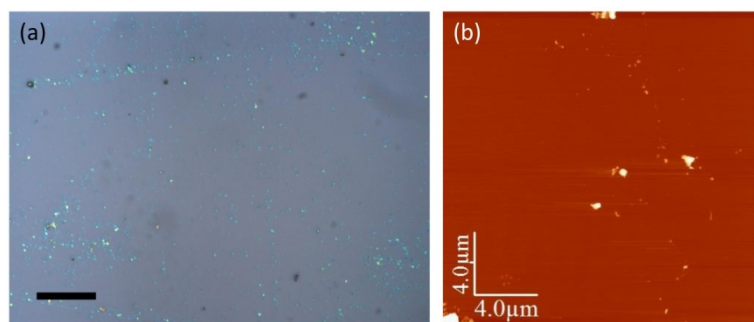

Figure S11. Left: Optical microscopy image, 144 μm x 108 μm, scale bar 30 μm; right: AFM image of a sample with P/H<sub>2</sub>O molar ratio equal to 0.7.

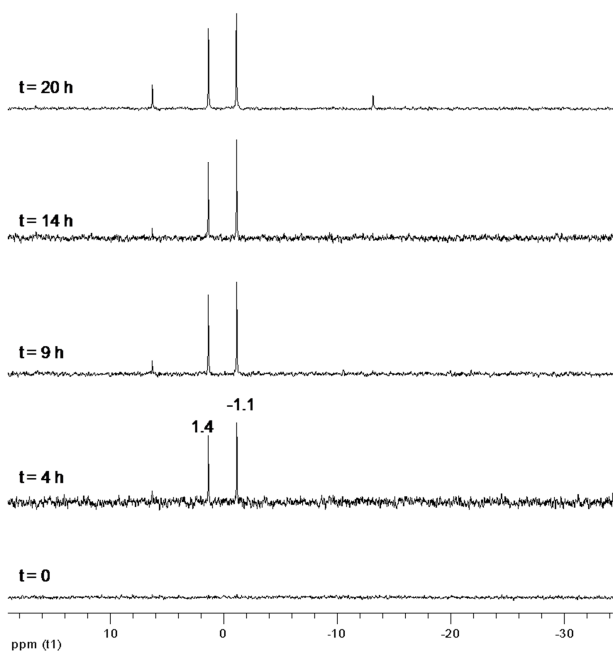

Figure S12.  $^{31}\text{P}\{^1\text{H}\}$  NMR spectra (DMSO- $d_6$ ,  $T = 25^\circ\text{C}$ , 121.49 MHz) measured during the sonication.

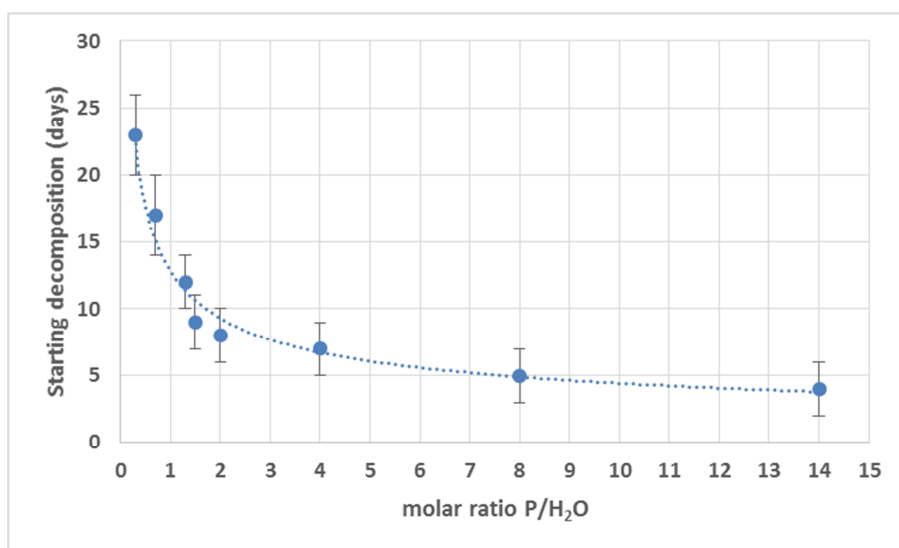

Figure S13. Starting of the exfoliated BP decomposition plotted against the P/ $\text{H}_2\text{O}$  molar ratio (as shown by the appearance of the -24.9 ppm signal in the  $^{31}\text{P}\{^1\text{H}\}$  NMR)

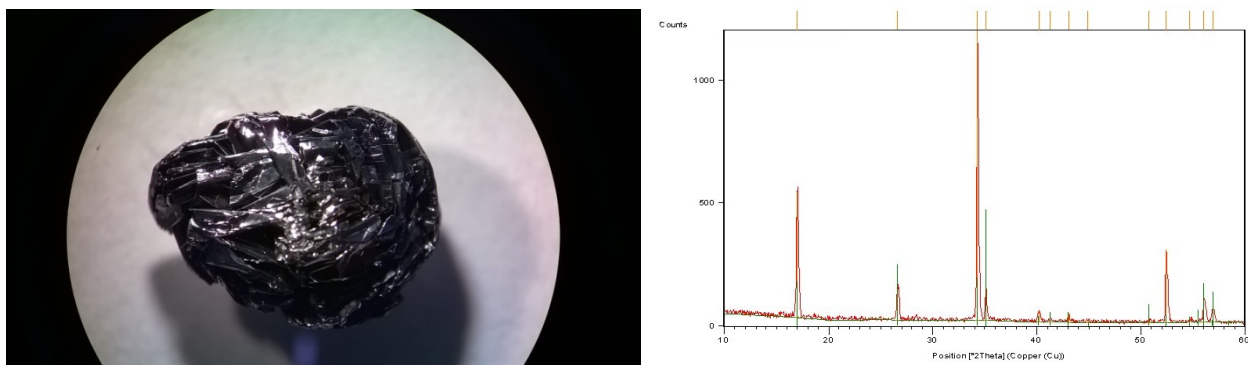

Figure S14. Picture of a BP crystal obtained after the synthesis (left); X-Ray powder diffraction of BP crystals (right).
